# Supplementary material for: Robust Topographical Micro-Patterning of Nanofibrillar Collagen Gel by In Situ Photochemical Crosslinking-Assisted Collagen Embossing
Source: MDPI journal article supplement (doi:10.3390/nano10122574), 2020-12-21
Supplement: s1 [file s1]

## Supplementary information

### Robust topographical micro-patterning of nanofibrillar collagen gel by *in situ* photochemical crosslinking-assisted collagen embossing

Hyeonjun Hong and Dong Sung Kim

(1) Conventional collagen compression-based embossing and IPC-CE process

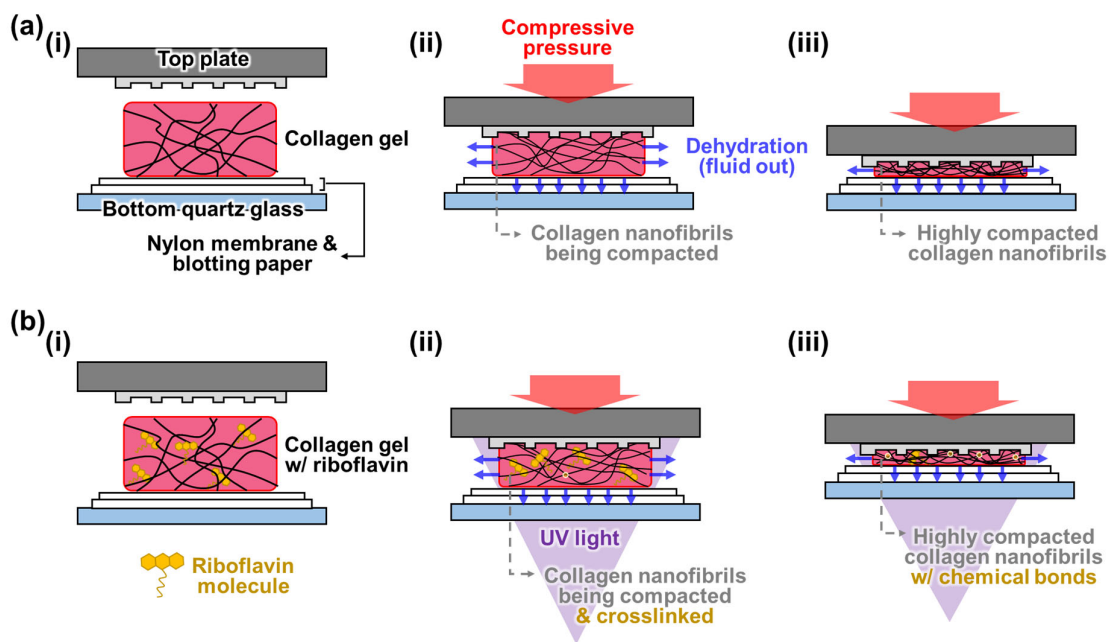

**Figure S1.** Schematic illustrations of (a) Conventional compression-based embossing and (b) IPC-CE process. Collagen gel (i) at initial, (ii) intermediate, and (iii) final stage of each process.

(2) *Various sizes and shapes of micro-patterns*

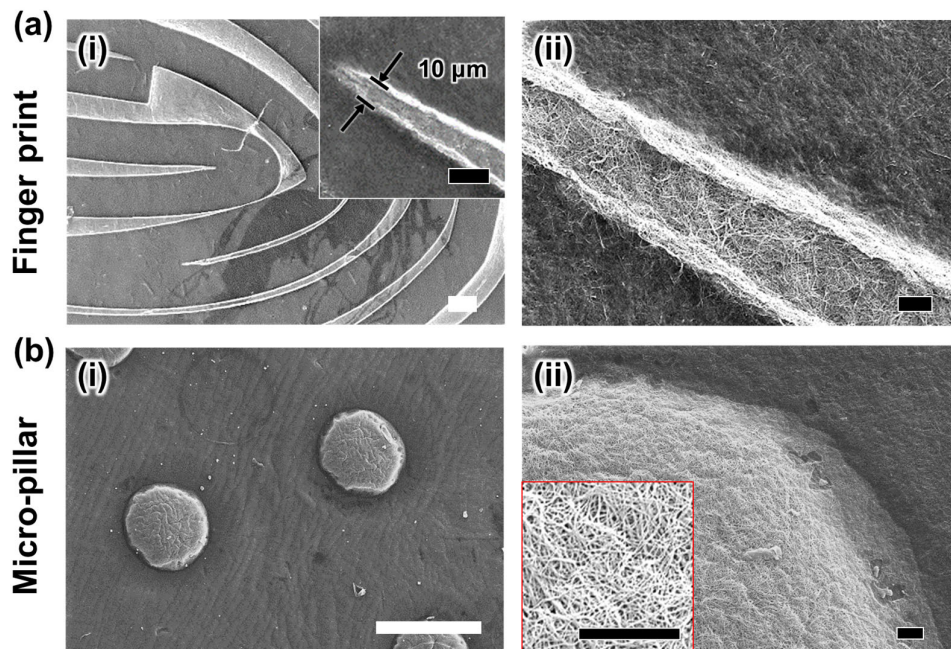

**Figure S2.** Various sizes and shapes of micro-patterns of IPC-CE construct. SEM images of IPC-CE construct with (a) fingerprint ( $\sim 8\text{--}700\text{ }\mu\text{m}$  in width) and (b) micro-pillar patterns ( $\sim 150\text{ }\mu\text{m}$  in diameter) at (i) low and (ii) high magnifications. White and black scale bars are  $200$  and  $5\text{ }\mu\text{m}$ , respectively.
